# Supplementary material for: Activity of Patchouli and Tea Tree Essential Oils against Staphylococci Isolated from Pyoderma in Dogs and Their Synergistic Potential with Gentamicin and Enrofloxacin
Source: MDPI journal article supplement (doi:10.3390/ani13081279), 2023-04-07
Supplement: s1 [file s1]

**Table S1.** Checkerboard analysis with final interactions when the essential oil concentration is expressed in mg/mL instead % v/v (best match within triplicate; differences to Table 3. are highlighted in **bold** and **red**).

| antimicrobial agent                         | patchouli oil    |                  |       |                       | tea tree oil     |                  |       |                       |
|---------------------------------------------|------------------|------------------|-------|-----------------------|------------------|------------------|-------|-----------------------|
|                                             | MIC <sub>i</sub> | MIC <sub>c</sub> | FIC   | ΣFIC<br>[interaction] | MIC <sub>i</sub> | MIC <sub>c</sub> | FIC   | ΣFIC<br>[interaction] |
| <i>Staphylococcus aureus</i> ATCC 25923     |                  |                  |       |                       |                  |                  |       |                       |
| oil (mg/mL)                                 | <b>2.4</b>       | <b>0.08</b>      | 0.033 | 0.283                 | <b>22.4</b>      | <b>0.7</b>       | 0.031 | 0.281                 |
| gentamicin (µg/mL)                          | 1                | 0.25             | 0.25  | synergy               | 1                | 0.25             | 0.25  | synergy               |
| oil (mg/mL)                                 | <b>1.2</b>       | <b>1.2</b>       | 1     | 2.0                   | <b>11.2</b>      | <b>11.2</b>      | 1     | 2.0                   |
| enrofloxacin (µg/mL)                        | 0.125            | 0.125            | 1     | none                  | 0.125            | 0.125            | 1     | none                  |
| <i>Staphylococcus aureus</i> Sa 1           |                  |                  |       |                       |                  |                  |       |                       |
| oil (mg/mL)                                 | <b>4.8</b>       | <b>1.2</b>       | 0.25  | 0.75                  | <b>44.8</b>      | <b>11.2</b>      | 0.25  | 0.5                   |
| gentamicin (µg/mL)                          | 2                | 1                | 0.5   | additive              | 0.5              | 0.125            | 0.25  | synergy               |
| oil (mg/mL)                                 | <b>4.8</b>       | <b>2.4</b>       | 0.5   | 1.0                   | <b>44.8</b>      | <b>11.2</b>      | 0.25  | 0.375                 |
| enrofloxacin (µg/mL)                        | 8                | 4                | 0.5   | additive              | 8                | 1                | 0.125 | synergy               |
| <i>Staphylococcus aureus</i> Sa 2           |                  |                  |       |                       |                  |                  |       |                       |
| oil (mg/mL)                                 | <b>4.8</b>       | <b>1.2</b>       | 0.25  | 0.75                  | <b>89.6</b>      | <b>11.2</b>      | 0.125 | 0.25                  |
| gentamicin (µg/mL)                          | 1                | 0.5              | 0.5   | additive              | 0.5              | 0.0625           | 0.125 | synergy               |
| oil (mg/mL)                                 | <b>2.4</b>       | <b>2.4</b>       | 1     | 2.0                   | <b>44.8</b>      | <b>44.8</b>      | 1     | 2.0                   |
| enrofloxacin (µg/mL)                        | 4                | 4                | 1     | none                  | 4                | 4                | 1     | none                  |
| <i>Staphylococcus aureus</i> Sa 3           |                  |                  |       |                       |                  |                  |       |                       |
| oil (mg/mL)                                 | <b>4.8</b>       | <b>1.2</b>       | 0.25  | 0.5                   | <b>22.4</b>      | <b>5.6</b>       | 0.25  | 0.5                   |
| gentamicin (µg/mL)                          | 16               | 4                | 0.25  | synergy               | 8                | 2                | 0.25  | synergy               |
| oil (mg/mL)                                 | <b>2.4</b>       | <b>2.4</b>       | 1     | 2.0                   | <b>44.8</b>      | <b>44.8</b>      | 1     | 2.0                   |
| enrofloxacin (µg/mL)                        | 32               | 32               | 1     | none                  | 32               | 32               | 1     | none                  |
| <i>Staphylococcus aureus</i> Sa 4           |                  |                  |       |                       |                  |                  |       |                       |
| oil (mg/mL)                                 | <b>2.4</b>       | <b>1.2</b>       | 0.5   | 0.625                 | <b>22.4</b>      | <b>2.8</b>       | 0.125 | 0.250                 |
| gentamicin (µg/mL)                          | 0.5              | 0.0625           | 0.125 | additive              | 0.5              | 0.0625           | 0.125 | synergy               |
| oil (mg/mL)                                 | <b>2.4</b>       | <b>2.4</b>       | 1     | 2.0                   | <b>11.2</b>      | <b>11.2</b>      | 1     | 2.0                   |
| enrofloxacin (µg/mL)                        | 0.25             | 0.25             | 1     | none                  | 0.125            | 0.125            | 1     | none                  |
| <i>Staphylococcus aureus</i> Sa 5           |                  |                  |       |                       |                  |                  |       |                       |
| oil (mg/mL)                                 | <b>2.4</b>       | <b>0.6</b>       | 0.25  | 0.75                  | <b>22.4</b>      | <b>5.6</b>       | 0.25  | 0.378                 |
| gentamicin (µg/mL)                          | 0.25             | 0.125            | 0.5   | additive              | 0.25             | 0.032            | 0.128 | synergy               |
| oil (mg/mL)                                 | <b>2.4</b>       | <b>2.4</b>       | 1     | 2.0                   | <b>11.2</b>      | <b>11.2</b>      | 1     | 2.0                   |
| enrofloxacin (µg/mL)                        | 1                | 1                | 1     | none                  | 0.5              | 0.5              | 1     | none                  |
| <i>Staphylococcus aureus</i> Sa 6           |                  |                  |       |                       |                  |                  |       |                       |
| oil (mg/mL)                                 | <b>1.2</b>       | <b>0.15</b>      | 0.125 | 0.381                 | <b>11.2</b>      | <b>1.4</b>       | 0.125 | 0.253                 |
| gentamicin (µg/mL)                          | 0.125            | 0.032            | 0.256 | synergy               | 0.125            | 0.016            | 0.128 | synergy               |
| oil (mg/mL)                                 | <b>1.2</b>       | <b>0.3</b>       | 0.250 | 0.750                 | <b>11.2</b>      | <b>5.6</b>       | 0.5   | 1.0                   |
| enrofloxacin (µg/mL)                        | 0.125            | 0.0625           | 0.5   | additive              | 0.125            | 0.0625           | 0.5   | additive              |
| <i>Staphylococcus aureus</i> Sa 7           |                  |                  |       |                       |                  |                  |       |                       |
| oil (mg/mL)                                 | <b>2.4</b>       | <b>0.6</b>       | 0.25  | 0.506                 | <b>11.2</b>      | <b>2.8</b>       | 0.250 | 0.762                 |
| gentamicin (µg/mL)                          | 0.125            | 0.032            | 0.256 | additive              | 0.0625           | 0.032            | 0.512 | additive              |
| oil (mg/mL)                                 | <b>1.2</b>       | <b>0.6</b>       | 0.5   | 1.012                 | <b>5.6</b>       | <b>5.6</b>       | 1     | 2.0                   |
| enrofloxacin (µg/mL)                        | 0.0625           | 0.032            | 0.512 | additive              | 0.125            | 0.125            | 1     | none                  |
| <i>Staphylococcus pseudintermedius</i> ED99 |                  |                  |       |                       |                  |                  |       |                       |
| oil (mg/mL)                                 | <b>2.4</b>       | <b>0.3</b>       | 0.125 |                       | <b>22.4</b>      | <b>2.8</b>       | 0.125 |                       |

| antimicrobial agent                          | patchouli oil    |                  |        |                       | tea tree oil     |                  |        |                       |
|----------------------------------------------|------------------|------------------|--------|-----------------------|------------------|------------------|--------|-----------------------|
|                                              | MIC <sub>i</sub> | MIC <sub>c</sub> | FIC    | ΣFIC<br>[interaction] | MIC <sub>i</sub> | MIC <sub>c</sub> | FIC    | ΣFIC<br>[interaction] |
| gentamicin (µg/mL)                           | 0.5              | 0.032            | 0.064  | 0.189                 | 0.5              | 0.064            | 0.128  | 0.253                 |
| oil (mg/mL)                                  | 1.2              | 0.08             | 0.067  | 0.567                 | 11.2             | 11.2             | 1      | 2.0                   |
| enrofloxacin (µg/mL)                         | 0.25             | 0.125            | 0.5    | additive              | 0.125            | 0.125            | 1      | none                  |
| <i>Staphylococcus pseudintermedius</i> Sps 1 |                  |                  |        |                       |                  |                  |        |                       |
| oil (mg/mL)                                  | 4.8              | 0.6              | 0.125  | 0.375                 | 44.8             | 5.6              | 0.125  | 0.375                 |
| gentamicin (µg/mL)                           | 64               | 16               | 0.25   | synergy               | 32               | 8                | 0.25   | synergy               |
| oil (mg/mL)                                  | 2.4              | 0.15             | 0.0625 | 0.563                 | 11.2             | 0.7              | 0.0625 | 0.313                 |
| enrofloxacin (µg/mL)                         | 32               | 16               | 0.5    | additive              | 64               | 16               | 0.25   | synergy               |
| <i>Staphylococcus pseudintermedius</i> Sps 2 |                  |                  |        |                       |                  |                  |        |                       |
| oil (mg/mL)                                  | 4.8              | 1.2              | 0.25   | 0.75                  | 11.2             | 1.4              | 0.125  | 0.375                 |
| gentamicin (µg/mL)                           | 64               | 32               | 0.5    | additive              | 32               | 8                | 0.25   | synergy               |
| oil (mg/mL)                                  | 2.4              | 0.15             | 0.0625 | 0.563                 | 11.2             | 11.2             | 1      | 2.0                   |
| enrofloxacin (µg/mL)                         | 64               | 32               | 0.5    | additive              | 64               | 64               | 1      | none                  |
| <i>Staphylococcus pseudintermedius</i> Sps 3 |                  |                  |        |                       |                  |                  |        |                       |
| oil (mg/mL)                                  | 4.8              | 2.4              | 0.5    | 0.625                 | 11.2             | 1.4              | 0.125  | 0.188                 |
| gentamicin (µg/mL)                           | 128              | 16               | 0.125  | additive              | 64               | 4                | 0.0625 | synergy               |
| oil (mg/mL)                                  | 4.8              | 0.3              | 0.0625 | 0.563                 | 11.2             | 11.2             | 1      | 2.0                   |
| enrofloxacin (µg/mL)                         | 64               | 32               | 0.5    | additive              | 64               | 64               | 1      | none                  |
| <i>Staphylococcus pseudintermedius</i> Sps 4 |                  |                  |        |                       |                  |                  |        |                       |
| oil (mg/mL)                                  | 4.8              | 1.2              | 0.25   | 0.5                   | 5.6              | 1.4              | 0.250  | 0.375                 |
| gentamicin (µg/mL)                           | 64               | 16               | 0.25   | synergy               | 32               | 4                | 0.125  | synergy               |
| oil (mg/mL)                                  | 4.8              | 4.8              | 1      | 2.0                   | 11.2             | 11.2             | 1      | 2.0                   |
| enrofloxacin (µg/mL)                         | 32               | 32               | 1      | none                  | 64               | 64               | 1      | none                  |
| <i>Staphylococcus pseudintermedius</i> Sps 5 |                  |                  |        |                       |                  |                  |        |                       |
| oil (mg/mL)                                  | 4.8              | 1.2              | 0.25   | 0.5                   | 44.8             | 11.2             | 0.25   | 0.281                 |
| gentamicin (µg/mL)                           | 256              | 64               | 0.25   | synergy               | 128              | 4                | 0.031  | synergy               |
| oil (mg/mL)                                  | 4.8              | 0.3              | 0.0625 | 0.563                 | 11.2             | 5.6              | 0.5    | 1.0                   |
| enrofloxacin (µg/mL)                         | 64               | 32               | 0.5    | additive              | 64               | 32               | 0.5    | additive              |
| <i>Staphylococcus pseudintermedius</i> Sps 6 |                  |                  |        |                       |                  |                  |        |                       |
| oil (mg/mL)                                  | 4.8              | 2.4              | 0.5    | 0.75                  | 22.4             | 2.8              | 0.125  | 0.156                 |
| gentamicin (µg/mL)                           | 128              | 32               | 0.25   | additive              | 64               | 2                | 0.031  | synergy               |
| oil (mg/mL)                                  | 4.8              | 4.8              | 1      | 2.0                   | 22.4             | 22.4             | 1      | 3.0                   |
| enrofloxacin (µg/mL)                         | 32               | 32               | 1      | none                  | 64               | 128              | 2      | none                  |
| <i>Staphylococcus pseudintermedius</i> Sps 7 |                  |                  |        |                       |                  |                  |        |                       |
| oil (mg/mL)                                  | 4.8              | 2.4              | 0.5    | 1                     | 5.6              | 1.4              | 0.250  | 0.375                 |
| gentamicin (µg/mL)                           | 128              | 64               | 0.5    | additive              | 32               | 4                | 0.125  | synergy               |
| oil (mg/mL)                                  | 4.8              | 0.08             | 0.016  | 0.516                 | 11.2             | 5.6              | 0.5    | 1.0                   |
| enrofloxacin (µg/mL)                         | 64               | 32               | 0.5    | additive              | 128              | 64               | 0.5    | additive              |
| <i>Staphylococcus pseudintermedius</i> Sps 8 |                  |                  |        |                       |                  |                  |        |                       |
| oil (mg/mL)                                  | 4.8              | 1.2              | 0.25   | 0.75                  | 11.2             | 1.4              | 0.125  | 0.188                 |
| gentamicin (µg/mL)                           | 128              | 64               | 0.5    | additive              | 64               | 4                | 0.0625 | synergy               |
| oil (mg/mL)                                  | 4.8              | 4.8              | 1      | 2.0                   | 11.2             | 11.2             | 1      | 2.0                   |
| enrofloxacin (µg/mL)                         | 64               | 64               | 1      | none                  | 64               | 64               | 1      | none                  |
| <i>Staphylococcus pseudintermedius</i> Sps 9 |                  |                  |        |                       |                  |                  |        |                       |
| oil (mg/mL)                                  | 4.8              | 1.2              | 0.25   |                       | 44.8             | 11.2             | 0.25   |                       |

| antimicrobial agent                                  | patchouli oil    |                  |       |                       | tea tree oil     |                  |       |                       |
|------------------------------------------------------|------------------|------------------|-------|-----------------------|------------------|------------------|-------|-----------------------|
|                                                      | MIC <sub>i</sub> | MIC <sub>c</sub> | FIC   | ΣFIC<br>[interaction] | MIC <sub>i</sub> | MIC <sub>c</sub> | FIC   | ΣFIC<br>[interaction] |
| gentamicin (µg/mL)                                   | 64               | 8                | 0.125 | 0.375                 | 32               | 4                | 0.125 | 0.375                 |
| oil (mg/mL)                                          | <b>4.8</b>       | <b>4.8</b>       | 1     | 2.0                   | <b>11.2</b>      | <b>11.2</b>      | 1     | 2.0                   |
| enrofloxacin (µg/mL)                                 | 0.125            | 0.125            | 1     | none                  | 0.125            | 0.125            | 1     | none                  |
| <b><i>Staphylococcus pseudintermedius</i> Sps 10</b> |                  |                  |       |                       |                  |                  |       |                       |
| oil (mg/mL)                                          | <b>4.8</b>       | <b>1.2</b>       | 0.25  | 0.506                 | <b>11.2</b>      | <b>2.8</b>       | 0.250 | <b>0.506</b>          |
| gentamicin (µg/mL)                                   | 0.125            | 0.032            | 0.256 | additive              | 0.0625           | 0.016            | 0.256 | additive              |
| oil (mg/mL)                                          | <b>4.8</b>       | <b>4.8</b>       | 1     | 2.0                   | <b>11.2</b>      | <b>11.2</b>      | 1     | 2.0                   |
| enrofloxacin (µg/mL)                                 | 64               | 64               | 1     | none                  | 32               | 32               | 1     | none                  |
| <b><i>Staphylococcus pseudintermedius</i> Sps 11</b> |                  |                  |       |                       |                  |                  |       |                       |
| oil (mg/mL)                                          | <b>4.8</b>       | <b>2.4</b>       | 0.5   | 0.75                  | <b>22.4</b>      | <b>5.6</b>       | 0.25  | 0.378                 |
| gentamicin (µg/mL)                                   | 0.5              | 0.125            | 0.25  | additive              | 0.125            | 0.016            | 0.128 | synergy               |
| oil (mg/mL)                                          | <b>4.8</b>       | <b>4.8</b>       | 1     | 2.0                   | <b>5.6</b>       | <b>5.6</b>       | 1     | 2.0                   |
| enrofloxacin (µg/mL)                                 | 0.125            | 0.125            | 1     | none                  | 0.125            | 0.125            | 1     | none                  |
| <b><i>Staphylococcus pseudintermedius</i> Sps 12</b> |                  |                  |       |                       |                  |                  |       |                       |
| oil (mg/mL)                                          | <b>4.8</b>       | <b>2.4</b>       | 0.5   | 0.75                  | <b>44.8</b>      | <b>11.2</b>      | 0.25  | 0.5                   |
| gentamicin (µg/mL)                                   | 32               | 8                | 0.25  | additive              | 8                | 2                | 0.25  | synergy               |
| oil (mg/mL)                                          | <b>4.8</b>       | <b>4.8</b>       | 1     | 2.0                   | <b>11.2</b>      | <b>11.2</b>      | 1     | 2.0                   |
| enrofloxacin (µg/mL)                                 | 0.5              | 0.5              | 1     | none                  | 0.5              | 0.5              | 1     | none                  |

Sa – *Staphylococcus aureus*; Sps – *Staphylococcus pseudintermedius*

MIC<sub>i</sub>: MIC individually as MIC<sup>(O)</sup> or MIC<sup>(A)</sup>; MIC<sub>c</sub>: MIC in combination as MIC<sup>(OxA)</sup> or MIC<sup>(AxO)</sup>; FIC: Fractional Inhibitory Concentrations

none = noninteractive
